# Supplementary material for: Probiotic Effects of a Marine Purple Non-Sulfur Bacterium, Rhodovulum sulfidophilum KKMI01, on Kuruma Shrimp (Marsupenaeus japonicus)
Source: MDPI journal article supplement (doi:10.3390/microorganisms10020244), 2022-01-22
Supplement: s1 [file s1]

Supplemental Text S1. List of primers used for qRT-PCR

Cuticular protein DD1 (AB194409)

DD1\_qF 5' -GGTTCTCGCCTTACCCCTTC-3'

DD1\_qR 5' -AGGATTTCGGCTAGCATCCG-3'

Cuticular protein DD5 (AB049147)

DD5\_qF 5' -CAGGGTCACAGGGAGTTCTG-3'

DD5\_qR 5' -CTTCTCGGGCACTGGTATCG-3'

Cuticular protein DD9A (AB031223)

DD9A-qF 5' -ATGAGAATGGCTTCGTCCCC-3'

DD9A-qR 5' -CGGCGATTTC AAGGAGTTCG-3'

Cuticular protein DD9B (AB031224)

DD9B-qF 5' -AGAAGTCAGATTCACCGCCG-3'

DD9B-qR 5' -GTTGGTCGGCGATTTC AAGG-3'

Crustocalcin-b (AB114445)

CrustocalcinB-qF 5' -GCCGAGGGAAAGTCGGAAGC-3'

CrustocalcinB-qR 5' -GGGCTTTCTCGACATCAGCA-3'

Ca<sup>2+</sup>-ATPase (C1999271)

Ca-ATPase-qF 5' -TCCAGCTCTTGTGGGTCAAC-3'

Ca-ATPase-qR 5' -GCGAGGAGGTTTGTCCATGA-3'

Crustacyanin\_A (FJ498897)

Crustacyanin\_A-qF 5' -TACACTCGCTGCATCCACTC-3'

Crustacyanin\_A-qR 5' -GTACTCGTTGTTGGGGCTGA-3'

Myosin heavy chain type b (MYHb) (AB613206)

MYHb-qF 5' -TCAGCATGGATCCCTCTCCA-3'

MYHb-qR 5' -GGAGTTCTTGGCCTCGTTCA-3'

Prophenoloxidase (AB065371)

proPO-F 5' -TCCAAGTGCCAGAACGAAATG-3'

|                                                      |                                  |
|------------------------------------------------------|----------------------------------|
| proPO-R                                              | 5' -CGATGAGACGCGAGGAAGA-3'       |
| SOD-2 (AB908996)                                     |                                  |
| SOD2qF                                               | 5' -AGTGACCCCTTAGTGAGCCT-3'      |
| SOD2qR                                               | 5' -GGTCTTCAAGCTGTCCTCGT-3'      |
| Heat shock protein 70 (HSP70) (DQ663761)             |                                  |
| hsp70-qF                                             | 5' -ATCACTCGTGCTCGCTTTGA-3'      |
| hsp70-qR                                             | 5' -ATCTTGGGGATACGGGTGGA-3'      |
| Diphthamide biosynthesis protein 7 (Dph7) (MG566082) |                                  |
| Dph7-qF                                              | 5' -AAACGACTTGGGCGTCTCTACC-3'    |
| Dph7-qR                                              | 5' -GGCAAGCATTGGTGTTCTGATA-3'    |
| Serine proteinase inhibitor (Serp) (AB505891)        |                                  |
| Serp-qF                                              | 5' -TTTGGTCGGCCTTCATCCTC-3'      |
| Serp-qR                                              | 5' -CCCGCCAGATCTTGAAGGT-3'       |
| Toll-like receptor 1 (AB333779)                      |                                  |
| TLR1-F                                               | 5' -TCGCCAGTACAGTGATCAGCAT-3'    |
| TLR1-R                                               | 5' -CATTACCACAGCCACAAG-3'        |
| Toll-like receptor 2 (AB385869)                      |                                  |
| TLR2-F                                               | 5' -CCTTCTCCTGTTTGCTGTCCTT-3'    |
| TLR2-R                                               | 5' -GCATCTAATTCGTCCTCTGTTATGG-3' |
| Dorsal (KX424930)                                    |                                  |
| Dorsal-qF                                            | 5' -AGACTGGGTTTTCTCATCGTAATC-3'  |
| Dorsal-qR                                            | 5' -TAAATGGGATCTGACACTTGTGG-3'   |
| Antilipopolysaccharide factor (ALF) (KX424931)       |                                  |
| AntLPS_KX424931_qF                                   | 5' -GATTGTGGCAGACCGGAGAA-3'      |
| AntLPS_KX424931_qR                                   | 5' -CATGCGACCCCTGAAGTACA-3'      |
| Antilipopolysaccharide factor D (ALF-D) (MN416688)   |                                  |
| AntLPS_D_qF                                          | 5' -CAACTTTCGTAGGCGCTGTG-3'      |

AntLPS\_D\_qR                      5' -GTTCCGGTCCTCCATAAGCC-3'

Crustin-like peptide (AB121740)

Crustin-F                      5' -GGTCGAGCGACTGCAGGTA-3'

Crustin-R                      5' -GGCAGTCCAGTGGCTTGGTA-3'

IMD (Immune deficiency) (AB478859)

IMDqF                      5' -TGGAATGAAGCCCTGTTCCC-3'

IMDqR                      5' -TGCCAAGGTGTTGCTTACT-3'
